# Supplementary material
Source: Springer Nature journal article supplement (https://www.springermedizin.de/resource/supplementary/13054_2012_1078_MOESM3_ESM.pdf/9711130)

### Physical Component Score

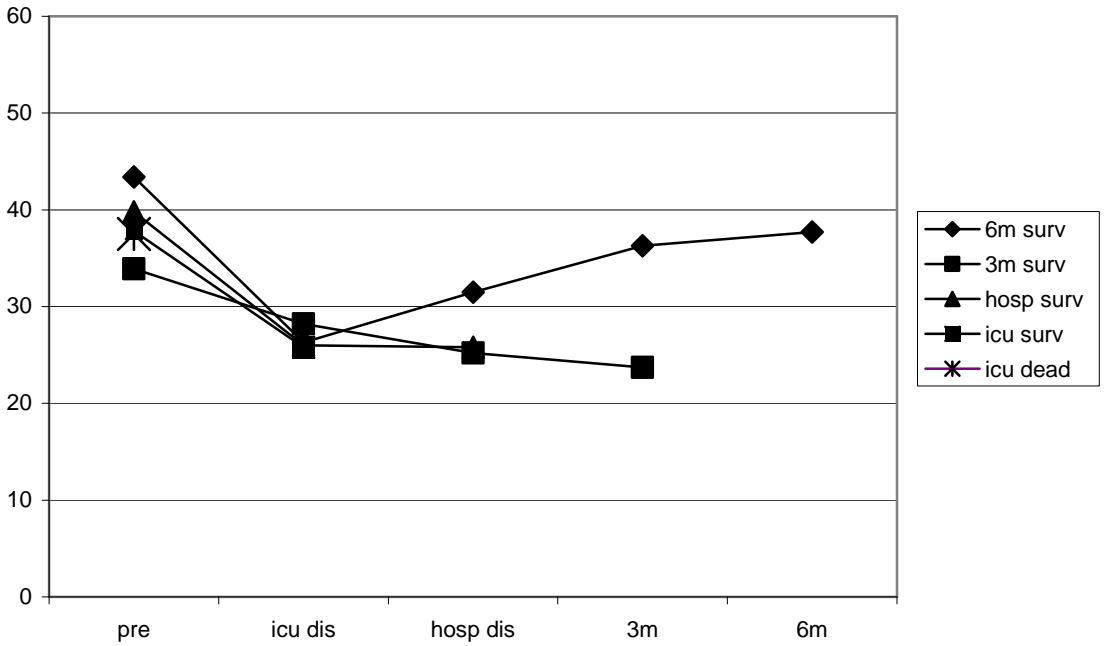

### Mental Component Score

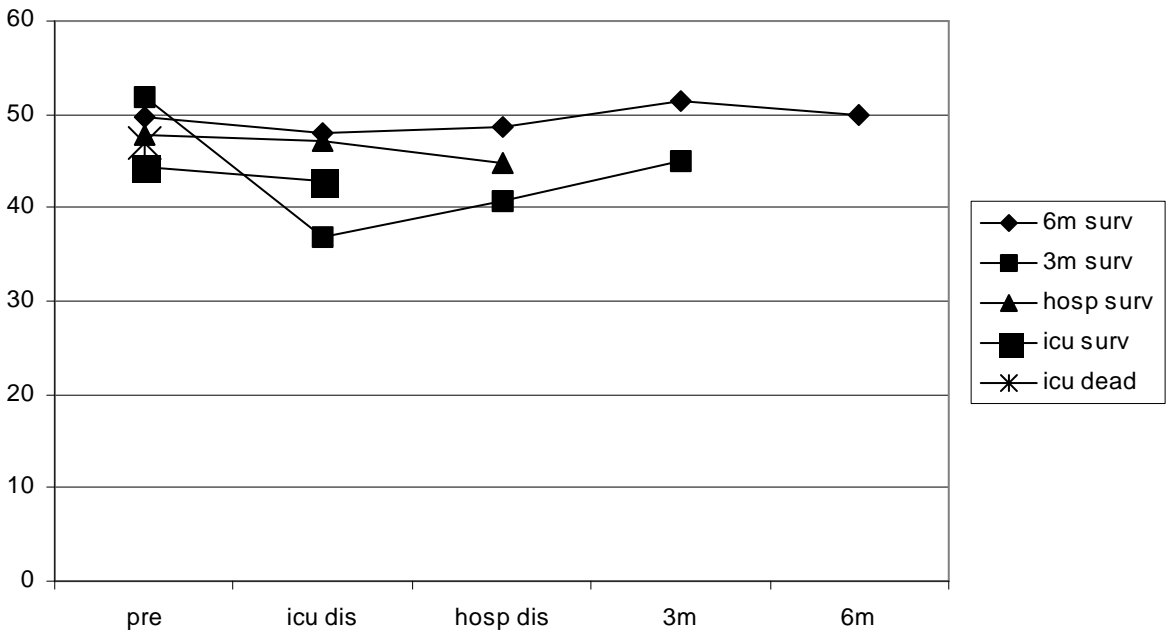

Supplement: MOESM3 [file 9711130]
